# Supplementary material for: Thermal stability of self-assembled ordered three-phase Au–BaTiO3–ZnO nanocomposite thin films via in situ heating in TEM
Source: Royal Society of Chemistry journal article supplement (doi:10.1039/d0nr06115h), 2020-01-01
Supplement: d0nr06115h1.pdf [file d0nr06115h1.pdf]

## Supplementary Information

### Thermal stability of self-assembled ordered three-phase Au-BaTiO<sub>3</sub>-ZnO nanocomposite thin films via *in situ* heating in TEM

Shikhar Misra,<sup>a</sup> Di Zhang,<sup>a</sup> Ping Lu,<sup>b</sup> Haiyan Wang<sup>a,c,\*</sup>

<sup>a</sup>School of Materials Engineering, Purdue University, West Lafayette, Indiana 47907, United States

<sup>b</sup>Sandia National Laboratory, Albuquerque, New Mexico 87185, United States

<sup>c</sup>School of Electrical and Computer Engineering, Purdue University, West Lafayette, Indiana 47907, United States

\* Author to whom correspondence should be addressed. E-mail: [hwang00@purdue.edu](mailto:hwang00@purdue.edu)

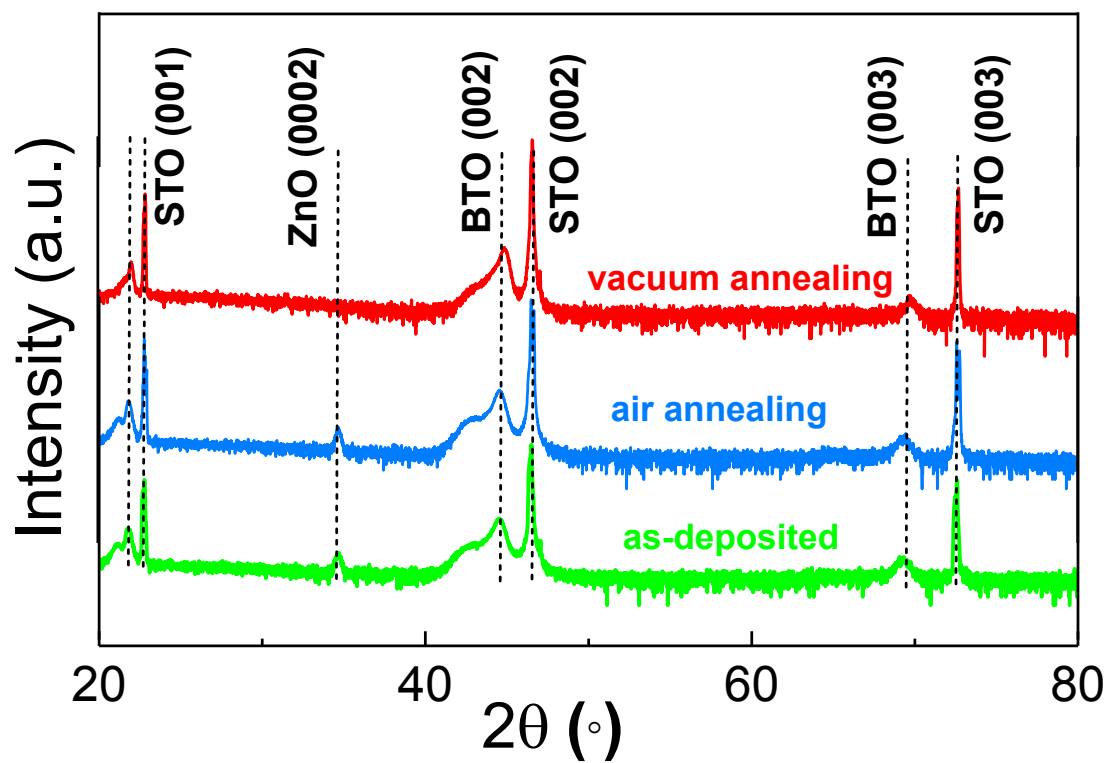

**Figure S1.** X-ray Diffraction. XRD plots of the as-deposited, air annealed and vacuum annealed three-phase Au-BaTiO<sub>3</sub>-ZnO nanocomposite.

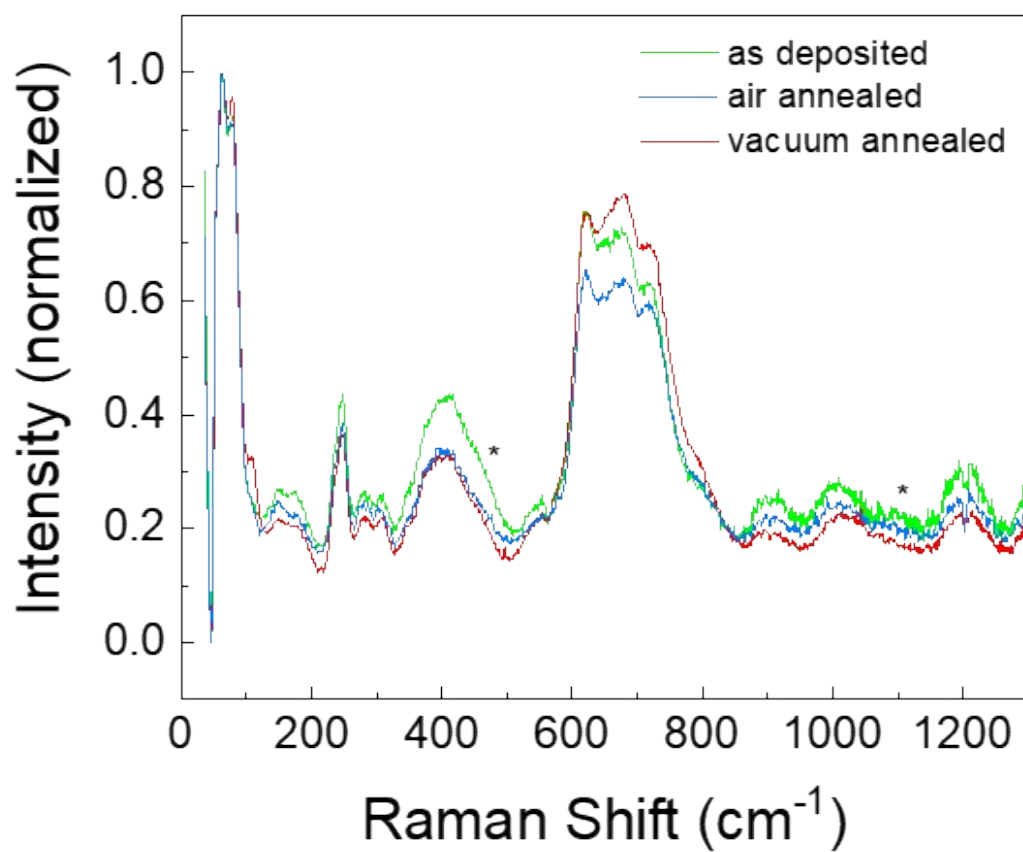

**Figure S2.** Raman Spectroscopy of the as-deposited, air annealed and vacuum annealed three-phase Au-BaTiO<sub>3</sub>-ZnO nanocomposite.

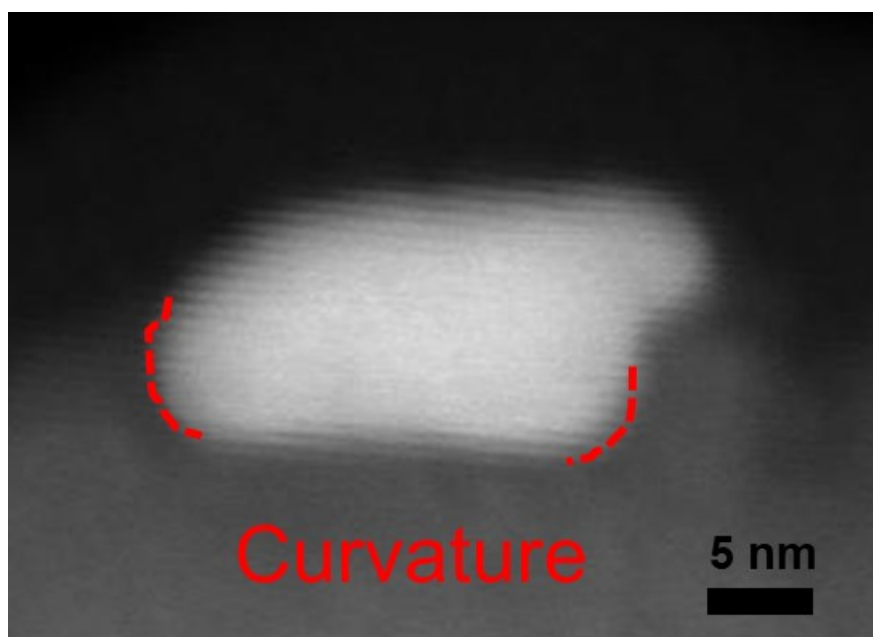

**Figure S3.** STEM image of the Au NP showing the curvature at room temperature

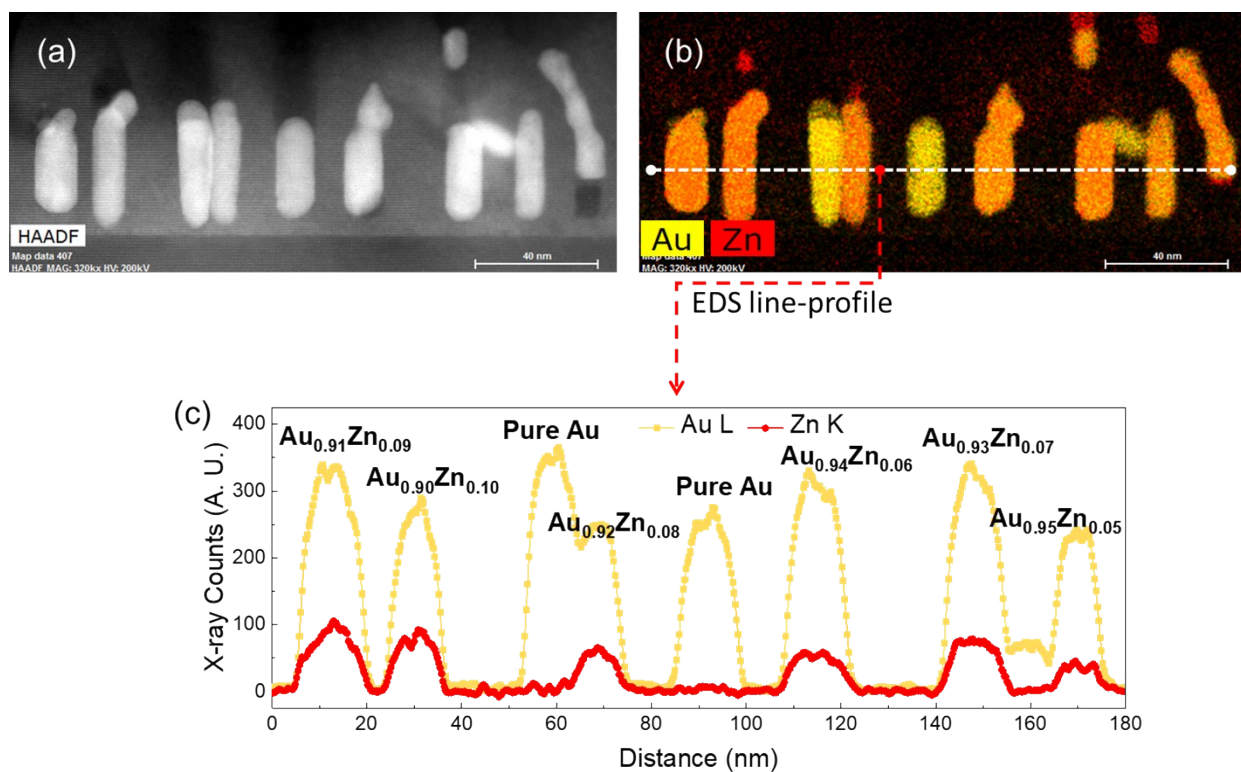

**Figure S4.** (a) STEM image of the vacuum annealed three-phase Au-BaTiO<sub>3</sub>-ZnO nanocomposite, (b) its corresponding EDS map and (c) the EDS line-scan showing the pillar compositions.
